# Supplementary material for: A Defined Terminal Region of the E. coli Chromosome Shows Late Segregation and High FtsK Activity
Source: PubMed Central journal article supplement (PMC3140498; doi:10.1371/journal.pone.0022164), 2011-07-20
Supplement: pone.0022164.s001.pdf [file pone.0022164.s001.pdf]

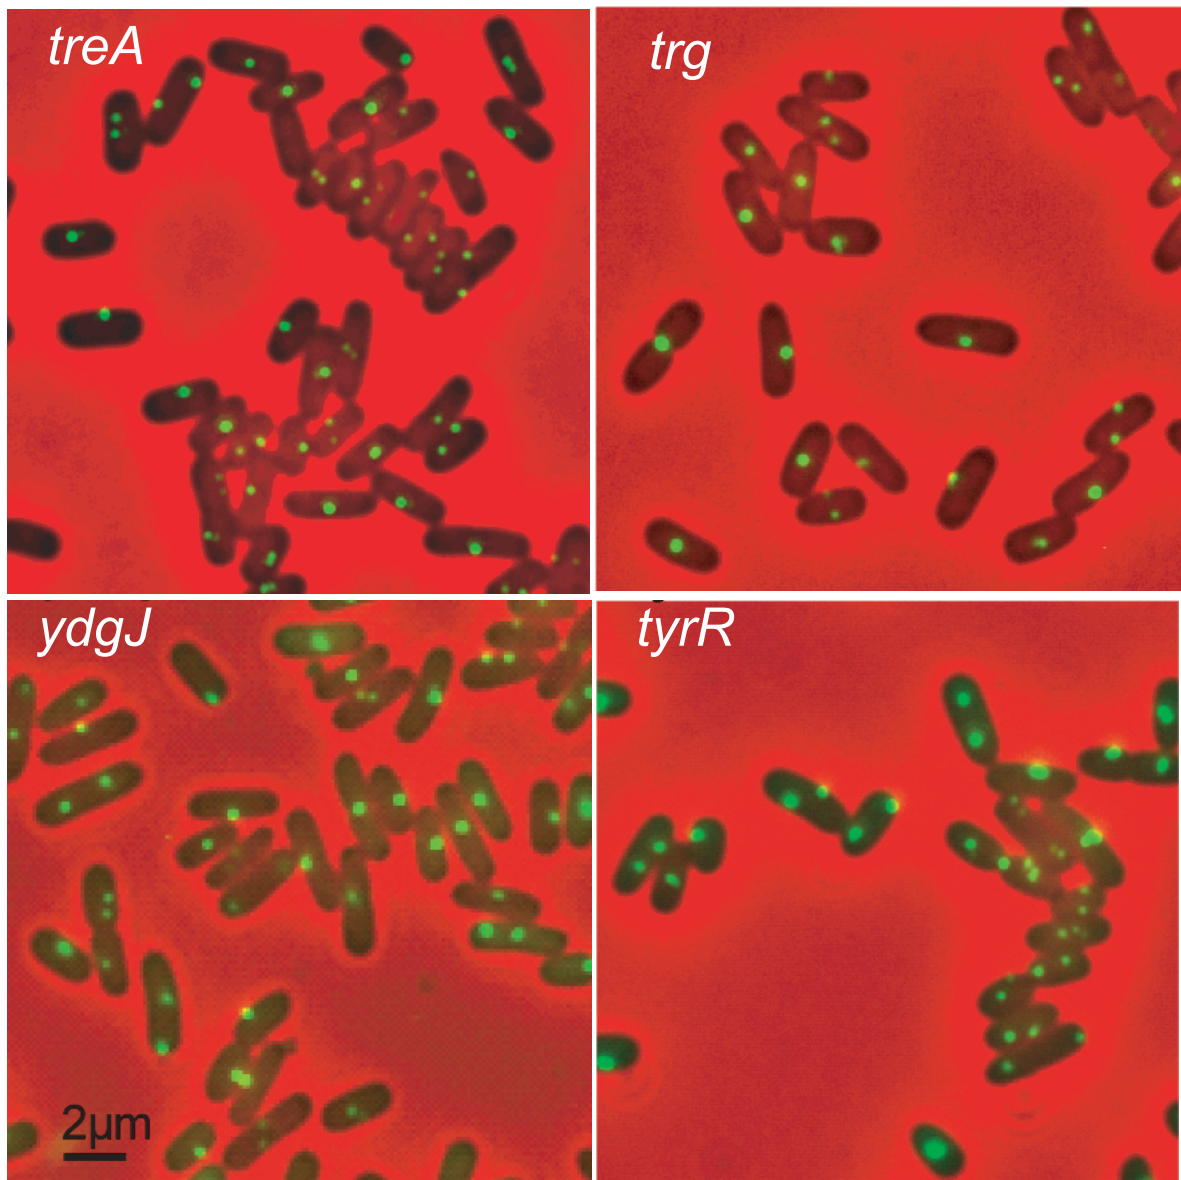

**Figure S1: Micrographs of cells with ParB-GFP/*parS* foci.** Strains carrying plasmid pALA2705 and *parS* insertions at the indicated locus were grown and micrographed as indicated in Materials and Methods.
